# Supplementary material
Source: PubMed Central journal article supplement (PMC6014695)
Supplement: EHP2505.s001.acco.pdf [file EHP2505.s001.acco.pdf]

**Note to readers with disabilities:** *EHP* strives to ensure that all journal content is accessible to all readers. However, some figures and Supplemental Material published in *EHP* articles may not conform to [508 standards](#) due to the complexity of the information being presented. If you need assistance accessing journal content, please contact [ehp508@niehs.nih.gov](mailto:ehp508@niehs.nih.gov). Our staff will work with you to assess and meet your accessibility needs within 3 working days.

### **Supplemental Material**

#### **Differential *in Vitro* Biological Action, Coregulator Interactions, and Molecular Dynamic Analysis of Bisphenol A (BPA), BPAF, and BPC Ligand–ER $\alpha$ Complexes**

Yin Li, Lalith Perera, Laurel A. Coons, Katherine A. Burns, J. Tyler Ramsey, Katherine E. Pelch, René Houtman, Rinie van Beuningen, Christina T. Teng, and Kenneth S. Korach

#### **Table of Contents**

**Table S1.** qPCR primers used in this study.

**Table S2.** 74 peptides that positively interact with the E2/ER $\alpha$  complex derived from 32 coregulator.

**Table S3.** 8 peptides that positively interact with the BPA/ER $\alpha$  complex derived from 7 coregulators.

**Table S4.** 9 peptides that positively interact with the BPAF/ER $\alpha$  complex derived from 9 coregulators.

**Table S5.** 25 peptides that positively interact with the BPS/ER $\alpha$  complex derived from 14 coregulators.

**Table S6.** 35 peptides that negatively interact with the E2/ER $\alpha$  complex derived from 22 coregulators.

**Table S7.** 44 peptides that negatively interact with the BPA/ER $\alpha$  complex derived from 28 coregulators.

**Table S8.** 75 peptides that negatively interact with the BPAF/ER $\alpha$  complex derived from 38 coregulators.

**Table S9.** 31 peptides that negatively interact with the BPS/ER $\alpha$  complex derived from 23 coregulators.

**Figure S1.** Working model of the MARCoNI assay. Cell lysates were isolated from the EGFP-tagged full-length human ER $\alpha$ -transfected U2OS cells. For MARCoNI, 25  $\mu$ L assay mixtures that contain cell lysates, 25 nM of Alexa488-conjugated GFP-antibody (Invitrogen), and 0.2 mM ligand (E2, BPA, BPAF or BPS, pre-diluted in DMSO, final concentration 2%) were prepared on ice. The ligand-modulated coregulator interactions with the EGFP-tagged ER $\alpha$  was assessed using a PamChip<sup>®</sup> plate which contained the 154 coregulator-derived binding peptides. The positive interaction means that ligand increases peptide binding and negative interaction means that the ligand decreases peptide binding to ER $\alpha$ .

**Figure S2.** Ligand interactions from the reported X-ray crystal structures. The ligand interactions with ER that were found in the X-ray crystal structures (A) E2, (B) BPA, and (C and D) BPAF in two conformations.

**Figure S3.** Root mean square deviations (RMSD) of ligand-free ER structures started at agonist (black) and antagonist (red) forms. The X-ray crystal structures were used as the reference structures for RMSD calculations and all backbone heavy atoms of each residue were used to calculate the average RMSD at each time point.

**Figure S4.** Ligand free conformations of ER $\alpha$  (starting with aqueous agonist form). Starting conformation is in white and the final conformation is in red. The three helices that are involved in creating the coregulator surface are marked.

**Figure S5.** Ligand free conformations of ER $\alpha$  (starting with antagonist form). Starting conformation is in white and the final conformation is in red.

**Figure S6.** Root mean square deviations (RMSD) of various ligand bound-ER structures. The X-ray crystal structures were used as the reference structures for these calculations and all backbone heavy atoms of each residue were used to calculate the average RMSD at each time point. For BPA, BPAF, and BPS, the black curve corresponds to the starting ligand in conformation “1” and the red curve to the ligand in conformation “2”.

**Figure S7.** E2-bound conformation of ER $\alpha$  (in which h12 is in agonist conformation). The final conformation of ER $\alpha$  with E2 from the MD simulation.

**Figure S8.** BPA-bound conformations of ER $\alpha$ . The final conformation of ER $\alpha$  with BPA started in conformation 1 is shown in the blue ribbon; The final conformation of ER $\alpha$  with BPA started in conformation 2 is shown in the red ribbon. BPA is shown in space filling in the ligand binding site of ER $\alpha$ .

**Figure S9.** BPAF-bound conformations of ER $\alpha$ . The final conformation of ER $\alpha$  with BPAF started in conformation 1 is shown in the blue ribbon; The final conformation of ER $\alpha$  with BPAF started in conformation 2 is shown in the red ribbon. BPAF is shown in space filling in the ligand binding site of ER $\alpha$ .

**Figure S10.** BPS-bound conformations of ER $\alpha$ . The final conformation of ER $\alpha$  with BPS started in conformation 1 is shown in the blue ribbon; The final conformation of ER $\alpha$  with BPS started in conformation 2 is shown in the red ribbon. BPS is shown in space filling in the ligand binding site of ER $\alpha$ .

**Figure S11.** Root mean square deviations (RMSD) of the ligands in their aqueous environments. Starting structures were used as the reference structures for these calculations and all heavy atoms of the ligand were used to calculate the average RMSD at each time point.

**Additional File** - Excel Document.

**Table S1. qPCR primers used in this study**

| <b>Gene symbol and GenBank accession number</b>      | <b>Sequence (5'-3')</b>                                |
|------------------------------------------------------|--------------------------------------------------------|
| Human <i>WISP2/CNN5</i><br>(NM_003881)               | F: TGAGCGGCACACCGAAGAC<br>R: ACAGCCATCCAGCACCAG        |
| Human <i>PGR</i><br>(NM_000926.4)                    | F: GACGTGGAGGGCGCATAT<br>R: GCAGTCCGCTGTCCTTTCT        |
| Human <i>GREB1</i><br>(NM_014668)                    | F: CAAAGAATAACCTGTTGGCCC<br>R: GACATGCCTGCGCTCTCATAAC  |
| Human <i><math>\beta</math>-actin</i><br>(NM_001101) | F: GACAGGATGCAGAAGGAGATCAC<br>R: GCTGATCCACATCTGCTGGAA |

**Table S2. 74 peptides that positively interact<sup>a</sup> with the E2/ER $\alpha$  complex derived from 32 coregulator**

| Peptide                  | Relative binding value <sup>b</sup> | Coregulator                                                           |
|--------------------------|-------------------------------------|-----------------------------------------------------------------------|
| BL1S1_1_11               | 5.8                                 | BLOC-1: biogenesis of lysosome-related organelles complex-1 subunit 1 |
| BRD8_254_276             | 34.3                                | TrCP120: thyroid hormone receptor coactivating protein 120kDa         |
| CBP_2055_2077            | 1.3                                 | CBP: CREB-binding protein                                             |
| CBP_57_80                | 24.4                                |                                                                       |
| CENPR_1_18               | 1.5                                 | CENP-R: centromere protein R                                          |
| EP300_69_91              | 16.5                                | P300: histone acetyltransferase p300/E1A-associated protein p300      |
| GNAQ_21_43               | 5.4                                 | G $\alpha$ q : guanine nucleotide-binding protein alpha-q             |
| HAIR_745_767_C755S/C759S | 18.3                                | H: protein hairless                                                   |
| IKBB_277_299             | 3.1                                 | NFkB:NF-kappa-B inhibitor beta                                        |
| ILK_131_153              | 4.5                                 | ILK-1/p59ILK: Integrin-liked protein kinase                           |
| JHD2C_2054_2076          | 19.0                                | TRIP-8: thyroid receptor-interacting protein 8                        |
| LCOR_40_62               | 34.5                                | LCoR: ligand-dependent corepressor                                    |
| MED1_591_614             | 11.2                                | TRIP-2: thyroid receptor-interacting protein 2                        |
| MED1_632_655             | 21.1                                |                                                                       |
| MLL2_4175_4197           | 2.7                                 | MLL2/KMT2B: myeloid/lymphoid or mixed-lineage leukemia protein 2      |
| MLL2_4702_4724           | 3.0                                 |                                                                       |
| NCOA1_1421_1441          | 5.6                                 | SRC-1/RIP160: nuclear receptor co-activator 1                         |
| NCOA1_620_643            | 45.1                                |                                                                       |
| NCOA1_677_700            | 5.5                                 |                                                                       |
| NCOA1_737_759            | 47.5                                |                                                                       |
| NCOA2_628_651            | 12.8                                | SRC-2/NCoA-2: nuclear receptor co-activator 2                         |
| NCOA2_677_700            | 9.7                                 |                                                                       |
| NCOA2_733_755            | 8.6                                 |                                                                       |
| NCOA3_104_123_N-KKK      | 2.5                                 | SRC-3/NCoA-3: nuclear receptor co-activator 3                         |
| NCOA3_609_631            | 21.1                                |                                                                       |
| NCOA3_609_631_C627S      | 13.1                                |                                                                       |
| NCOA3_673_695            | 5.8                                 |                                                                       |
| NCOA3_725_747            | 6.3                                 |                                                                       |
| NCOA6_875_897            | 7.6                                 | NCoA-6: nuclear receptor co-activator 6                               |
| NCOR1_2376_2398          | 2.8                                 | N-CoR1: nuclear receptor corepressor 1                                |
| NELFB_428_450            | 2.2                                 | NELF-B: negative elongation factor B                                  |
| NELFB_80_102             | 4.9                                 |                                                                       |
| NROB1_1_23               | 7.3                                 | DAX-1: nuclear receptor subfamily group B member 1                    |
| NROB1_136_159            | 3.9                                 |                                                                       |
| NROB1_68_90_C69S         | 6.8                                 |                                                                       |
| NROB2_106_128            | 12.2                                | SHP: small heterodimer partner/nuclear receptor subfamily member 2    |
| NROB2_201_223_C207S      | 11.1                                |                                                                       |
| NROB2_9_31_C9S/C11S      | 3.4                                 |                                                                       |
| NRBF2_128_150            | 10.4                                | NRBF-2: nuclear receptor subfamily 0 group B member 2                 |

|                          |      |                                                             |
|--------------------------|------|-------------------------------------------------------------|
| NRIP1_1055_1077          | 6.7  | RIP140: receptor-interacting protein 1                      |
| NRIP1_120_142            | 15.3 |                                                             |
| NRIP1_121_143_P124R      | 7.3  |                                                             |
| NRIP1_173_195            | 6.6  |                                                             |
| NRIP1_173_195_C177S      | 4.0  |                                                             |
| NRIP1_253_275_C263S      | 21.3 |                                                             |
| NRIP1_368_390            | 5.1  |                                                             |
| NRIP1_488_510            | 8.1  |                                                             |
| NRIP1_700_722            | 4.4  |                                                             |
| NRIP1_701_723            | 4.4  |                                                             |
| NRIP1_805_831            | 4.3  |                                                             |
| NRIP1_924_946            | 3.2  |                                                             |
| NRIP1_924_946_C945S      | 4.5  |                                                             |
| NSD1_894_916             | 7.4  | NSDP1: NR-binding SET domain-containing protein             |
| PELP1_168_190            | 1.2  | PELP1: proline-, glutamic acid-, and leucine-rich protein 1 |
| PELP1_20_42              | 2.0  |                                                             |
| PELP1_446_468            | 9.5  |                                                             |
| PNRC1_306_327            | 1.7  | PNRC1/B4-2: proline-rich nuclear receptor coactivator 1     |
| PPRC1_151_173            | 6.3  | PRC: PGC-1 related coactivator                              |
| PR285_1105_1127          | 6.1  | PDIP1: PPAR-gamma DBD-interacting protein 1                 |
| PRGC1_130_155            | 5.8  | PGC1 $\alpha$ : PPAR-g co-activator 1-alpha                 |
| PRGC1_134_154            | 5.2  |                                                             |
| PRGC2_146_166            | 7.1  | PGC1 $\beta$ : PPAR-g co-activator 1-alpha                  |
| PRGC2_338_358            | 6.0  |                                                             |
| PROX1_57_79              | 12.7 | PROX1: homeobox prospero-like protein                       |
| RBL2_875_897_C879S/C894S | 1.4  |                                                             |
| TIF1A_747_769            | 4.6  |                                                             |
| TIP60_476_498            | 12.1 | Tip60: 60 kDa Tat interactive protein                       |
| TREF1_168_190            | 43.7 | TReP132: transcriptional –regulating factor 1               |
| TRXR1_132_154            | 13.1 | TR: thioredoxinreductase TR1                                |
| UBE3A_649_671            | 2.8  | E6-AP: E6AP ubiquitin protein ligase                        |
| WIPI1_119_141            | 19.2 | WIPI-1: WD repeat phosphoinositide-interacting protein 1    |
| WIPI1_313_335_C318S      | 6.1  |                                                             |
| ZNH13_89_111             | 5.5  | TRIP-3: thyroid receptor interacting protein 3              |
| ZNT9_449_471             | 2.1  | ZnT-9/HUEL: zinc transporter 9/humanembryonic lung protein  |

<sup>a</sup>Positive interactions defined as: binding value>50, relative binding >1, p-value <0.05

<sup>b</sup>Relative binding value shows each peptide binding relative to the control, 2% DMSO

For complete results, see Excel Table S2

**Table S3. 8 peptides that positively interact<sup>a</sup> with the BPA/ER $\alpha$  complex derived from 7 coregulators**

| Peptide         | Relative binding value <sup>b</sup> | Coregulator                                                        |
|-----------------|-------------------------------------|--------------------------------------------------------------------|
| NCOA1_620_643   | 2.0                                 | SRC-1/RIP160: nuclear receptor co-activator 1                      |
| NCOA1_737_759   | 2.5                                 |                                                                    |
| NCOA2_628_651   | 1.3                                 | SRC-2/RIP160: nuclear receptor co-activator 1                      |
| NCOA6_875_897   | 1.5                                 | NCoA-6/RAP250: nuclear receptor co-activator 6                     |
| NROB2_106_128   | 1.1                                 | SHP: small heterodimer partner/nuclear receptor subfamily member 2 |
| NRIP1_1055_1077 | 1.1                                 | RIP140: receptor-interacting protein 1                             |
| PELP1_446_468   | 1.7                                 | PELP1: proline-, glutamic acid-, and leucine-rich protein 1        |
| PRGC1_134_154   | 1.1                                 | PGC1 $\alpha$ : PPAR-g co-activator 1-alpha                        |

<sup>a</sup>Positive interactions defined as: binding value>50, relative binding >1, p-value <0.05

<sup>b</sup>Relative binding value shows each peptide binding relative to the control, 2% DMSO  
For complete results, see Excel Table S2

**Table S4. 9 peptides that positively interact<sup>a</sup> with the BPAF/ER $\alpha$  complex derived from 9 coregulators**

| Peptide             | Relative binding value <sup>b</sup> | Coregulator                                                 |
|---------------------|-------------------------------------|-------------------------------------------------------------|
| KIF11_832_854_C854S | 1.9                                 | KIF11: kinesin-like protein KIF11                           |
| MAPE_356_378        | 1.9                                 | MAPE: melanoma antigen preferentially express protein       |
| NCOA3_104_123_N-KKK | 1.5                                 | SRC-3/NCoA-2: nuclear receptor co-activator 3               |
| PELP1_446_468       | 1.7                                 | PELP1: proline-, glutamic acid-, and leucine-rich protein 1 |
| PPRC1_1159_1181     | 1.5                                 | PRC: PGC-related coactivator                                |
| PRDM2_948_970       | 1.6                                 | PRDP2/MTB-ZF: PR domain-containing protein 2                |
| PRGR_102_124        | 3.4                                 | PR: progesterone receptor                                   |
| TF65_437_459        | 2.2                                 | TF65: transcription factor p65                              |
| ZNT9_449_471        | 1.5                                 | ZnT-9/HUEL: zinc transporter 9                              |

<sup>a</sup>Positive interactions defined as: binding value>50, relative binding >1, p-value <0.05

<sup>b</sup>Relative binding value shows each peptide binding relative to the control, 2% DMSO  
For complete results, see Excel Table S2

**Table S5. 25 peptides that positively interact<sup>a</sup> with the BPS/ER $\alpha$  complex derived from 14 coregulators**

| Peptide             | Relative binding value <sup>b</sup> | Coregulator                                                        |
|---------------------|-------------------------------------|--------------------------------------------------------------------|
| JHD2C_2054_2076     | 1.5                                 | TRIP-8: thyroid receptor-interacting protein 8                     |
| LCOR_40_62          | 3.1                                 | LCoR: ligand-dependent corepressor                                 |
| MED1_591_614        | 1.9                                 | TRIP-2: thyroid receptor-interacting protein 2                     |
| NCOA1_1421_1441     | 1.3                                 | SRC-1/RIP160: nuclear receptor co-activator 1                      |
| NCOA1_620_643       | 3.6                                 |                                                                    |
| NCOA1_677_700       | 1.6                                 |                                                                    |
| NCOA2_628_651       | 1.9                                 | SRC-2/NCoA-2: nuclear receptor co-activator 2                      |
| NCOA2_677_700       | 1.7                                 |                                                                    |
| NCOA2_733_755       | 1.4                                 |                                                                    |
| NCOA3_609_631       | 2.4                                 | SRC-3/NCoA-3: nuclear receptor co-activator 3                      |
| NCOA3_609_631_C627S | 1.7                                 |                                                                    |
| NCOA3_725_747       | 1.2                                 |                                                                    |
| NROB1_1_23          | 1.6                                 | DAX-1: nuclear receptor subfamily group B member 1                 |
| NROB1_136_159       | 1.2                                 |                                                                    |
| NROB1_68_90_C69S    | 1.6                                 |                                                                    |
| NROB2_106_128       | 2.1                                 | SHP: small heterodimer partner/nuclear receptor subfamily member 2 |
| NRIP1_1055_1077     | 1.9                                 | RIP140: receptor-interacting protein 1                             |
| NRIP1_120_142       | 1.6                                 |                                                                    |
| NRIP1_253_275_C263S | 1.9                                 |                                                                    |
| NSD1_894_916        | 1.2                                 | NSDP1: NR-binding SET domain-containing protein                    |
| PELP1_446_468       | 1.6                                 | PELP1: proline-, glutamic acid-, and leucine-rich protein 1        |
| PRGC1_130_155       | 1.9                                 | PGC1 $\alpha$ : PPAR-g co-activator 1-alpha                        |
| PRGC1_134_154       | 1.5                                 |                                                                    |
| PRGC2_146_166       | 1.5                                 | PGC1 $\beta$ : PPAR-g co-activator 1-beta                          |
| TIP60_476_498       | 1.4                                 | Tip60: 60 kDa Tat interactive protein                              |

<sup>a</sup>Positive interactions defined as: binding value>50, relative binding >1, p-value <0.05

<sup>b</sup>Relative binding value shows each peptide binding relative to the control, 2% DMSO  
For complete results, see Excel Table S2



**Table S6. 35 peptides that negatively interact<sup>a</sup> with the E2/ER $\alpha$  complex derived from 22 coregulators**

| Peptide                   | Relative binding value <sup>b</sup> | Coregulator                                                        |
|---------------------------|-------------------------------------|--------------------------------------------------------------------|
| ANDR_10_32                | 0.6                                 | AR: Androgen receptor                                              |
| CENPR_159_177             | 0.4                                 | CENP-R: nuclear receptor-interaction factor 3                      |
| CHD9_1023_1045            | 0.4                                 | CHD9: PPAR-alpha-interacting complex protein 320 kDa               |
| CHD9_855_877              | 0.4                                 |                                                                    |
| CNOT1_140_162             | 0.2                                 | NOT1H: negative regulator of transcription subunit 1 homolog       |
| CNOT1_1626_1648           | 0.3                                 |                                                                    |
| CNOT1_1929_1951_C1932S    | 0.3                                 |                                                                    |
| CNOT1_557_579             | 0.3                                 |                                                                    |
| DHX30_49_70               | 0.4                                 | DHX30: DEAH box protein 30                                         |
| GELS_376_398              | 0.7                                 | ADF: actin-depolymerizing factor                                   |
| HAIR_553_575_C567S        | 0.4                                 | H: hairless                                                        |
| MAPE_249_271              | 0.7                                 | OIP4: OPA-interacting protein 4                                    |
| MAPE_300_322              | 0.3                                 |                                                                    |
| MAPE_454_476_C472S        | 0.2                                 |                                                                    |
| MAPE_91_113               | 0.2                                 |                                                                    |
| MEN1_255_277              | 0.6                                 | MEN1: menin                                                        |
| MGMT_86_108               | 0.4                                 | MGMT: methylated-DNA-protein-cysteine methyltransferase            |
| MTA1S_388_410_C393S/C396S | 0.7                                 | MTA1: metastasis-associated protein                                |
| NCOR1_2039_2061           | 0.2                                 | N-CoR1: nuclear receptor corepressor 1                             |
| NCOR1_2039_2061_C2056S    | 0.2                                 |                                                                    |
| NCOR1_2251_2273           | 0.3                                 |                                                                    |
| NCOR2_2123_2145           | 0.5                                 | N-CoR2/SMRT: nuclear receptor corepressor 2                        |
| NCOR2_2330_2352           | 0.3                                 |                                                                    |
| NCOR2_649_671_C649S       | 0.6                                 |                                                                    |
| NELFB_328_350             | 0.5                                 | NELF-B: negative elongation factor B                               |
| NR0B2_237_257             | 0.3                                 | SHP: small heterodimer partner/nuclear receptor subfamily member 2 |
| PAK6_248_270              | 0.7                                 | PAK-6: serine/threonine-protein kinase p21-activated kinase 6      |
| PCAF_178_200              | 0.2                                 | PCAF: P300/CBP-associated factor                                   |
| PELP1_142_164             | 0.3                                 | PELP1: proline-, glutamic acid-, and leucine-rich protein 1        |
| PELP1_258_280             | 0.4                                 |                                                                    |
| PR285_2216_2238_C2219S    | 0.6                                 | PDIP1: PPAR-gamma DBD-interacting protein 1                        |
| TGFI1_325_347_C334S/C346S | 0.5                                 | TGFI1: transforming growth factor beta-1-induced transcript 1      |
| TGFI1_443_461_C452S/C455S | 0.4                                 |                                                                    |
| TIF1A_373_395_C394S       | 0.5                                 | TIF1-a: transcription intermediary factor 1-alpha                  |
| TREF1_850_872             | 0.5                                 | TREF1: transcriptional-regulating factor 1                         |

<sup>a</sup>Negative interactions defined as: binding value>50, relative binding <1, p-value <0.05

<sup>b</sup>Relative binding value shows each peptide binding relative to the control, 2% DMSO

For complete results, see Excel Table S2

**Table S7. 44 peptides that negatively interact<sup>a</sup> with the BPA/ER $\alpha$  complex derived from 28 coregulators**

| Peptide                   | Relative binding value <sup>b</sup> | Coregulator                                                           |
|---------------------------|-------------------------------------|-----------------------------------------------------------------------|
| ANDR_10_32                | 0.8                                 | AR: androgen receptor                                                 |
| BL1S1_1_11                | 0.8                                 | BLOC-1: biogenesis of lysosome-related organelles complex-1 subunit 1 |
| CBP_345_368_C367S         | 0.6                                 | CBP: CREB-binding protein                                             |
| CENPR_159_177             | 0.3                                 | CENP-R: centromere protein R                                          |
| CNOT1_1626_1648           | 0.2                                 | NOT1H: negative regulator of transcription subunit 1 homolog          |
| CNOT1_1929_1951_C1932S    | 0.3                                 |                                                                       |
| CNOT1_557_579             | 0.4                                 |                                                                       |
| DHX30_49_70               | 0.5                                 | DHX30: DEAH box protein 30                                            |
| GELS_376_398              | 0.5                                 | ADF: actin-depolymerizing factor                                      |
| GNAQ_21_43                | 0.7                                 | G $\alpha$ q : guanine nucleotide-binding protein alpha-q             |
| HAIR_553_575_C567S        | 0.4                                 | H: hairless                                                           |
| IKBB_277_299              | 0.7                                 | NF $\kappa$ B:NF-kappa-B inhibitor beta                               |
| MAPE_249_271              | 0.6                                 | OIP4: OPA-interacting protein 4                                       |
| MAPE_300_322              | 0.8                                 |                                                                       |
| MAPE_454_476_C472S        | 0.3                                 |                                                                       |
| MGMT_86_108               | 0.5                                 | MGMT: methylated-DNA-protein-cysteine methyltransferase               |
| MTA1S_388_410_C393S/C396S | 0.3                                 | MTA1: metastasis-associated protein                                   |
| NCOR1_1925_1946           | 0.6                                 | N-CoR1: nuclear receptor coresspressor 1                              |
| NCOR1_2039_2061           | 0.5                                 |                                                                       |
| NCOR1_2039_2061_C2056S    | 0.5                                 |                                                                       |
| NCOR1_2251_2273           | 0.3                                 |                                                                       |
| NCOR2_2123_2145           | 0.5                                 | N-CoR2/SMRT: nuclear receptor coresspressor 2                         |
| NCOR2_2330_2352           | 0.2                                 |                                                                       |
| NROB2_9_31_C9S/C11S       | 0.6                                 | SHP: small heterodimer partner/nuclear receptor subfamily member 2    |
| NRIP1_700_722             | 0.8                                 | RIP140: receptor-interacting protein 1                                |
| NRIP1_701_723             | 0.8                                 |                                                                       |
| NRIP1_924_946             | 0.7                                 |                                                                       |
| NSD1_894_916              | 0.6                                 | NSDP1: NR-binding SET domain-containing protein                       |
| PCAF_178_200              | 0.3                                 | PCAF: P300/CBP-associated factor                                      |
| PELP1_142_164             | 0.3                                 | PELP1: proline-, glutamic acid-, and leucine-rich protein 1           |
| PELP1_168_190             | 0.6                                 |                                                                       |
| PELP1_258_280             | 0.4                                 |                                                                       |
| PELP1_496_518_C496S       | 0.5                                 |                                                                       |
| PELP1_56_78_C71S          | 0.6                                 |                                                                       |
| PPRC1_1159_1181           | 0.6                                 | PRC: PGC-related coactivator                                          |
| PR285_1062_1084           | 0.3                                 | PDIP1: PPAR-gamma DBD-interacting protein 1                           |
| PR285_2216_2238_C2219S    | 0.4                                 |                                                                       |
| PRDM2_948_970             | 0.6                                 | PRDP2/MTB-ZF: PR domain-containing protein 2                          |
| RAD9A_348_370             | 0.4                                 | hRAD9: DNA repair exonuclease rad9 homolog A                          |
| TGFI1_325_347_C334S/C346S | 0.7                                 | TGFI1: transforming growth factor beta-1-induced transcript 1         |
| TIF1A_373_395_C394S       | 0.5                                 | TIF1-a: transcription intermediary factor 1-alpha                     |
| TREF1_850_872             | 0.7                                 | TREF1: transcriptional-regulating factor 1                            |
| TRRAP_770_792             | 0.6                                 | STAF40: transformation/transcription domain-associated protein        |
| TRRAP_971_993             | 0.7                                 |                                                                       |

<sup>a</sup>Negative interactions defined as: binding value>50, relative binding <1, p-value <0.05

<sup>b</sup>Relative binding value shows each peptide binding relative to the control, 2% DMSO

For complete results, see Excel Table S2

**Table S8. 75 peptides that negatively interact<sup>a</sup> with the BPAF/ER $\alpha$  complex derived from 38 coregulators**

| Peptide                | Relative binding value <sup>b</sup> | Coregulator                                                           |
|------------------------|-------------------------------------|-----------------------------------------------------------------------|
| ANDR_10_32             | 0.4                                 | AR: androgen receptor                                                 |
| BL1S1_1_11             | 0.8                                 | BLOC-1: biogenesis of lysosome-related organelles complex-1 subunit 1 |
| CBP_345_367_C367S      | 0.7                                 | CBP: CREB-binding protein                                             |
| CENPR_159_177          | 0.4                                 | CENP-R: centromere protein R                                          |
| CHD9_1023_1045         | 0.5                                 | CHD9: PPAR-alpha-interacting complex protein 320 kDa                  |
| CNOT1_140_162          | 0.2                                 | NOT1H: negative regulator of transcription subunit 1 homolog          |
| CNOT1_1626_1648        | 0.3                                 |                                                                       |
| CNOT1_1929_1951_C1932S | 0.3                                 |                                                                       |
| DHX30_49_70            | 0.4                                 | DHX30: DEAH box protein 30                                            |
| GNAQ_21_43             | 0.3                                 | G $\alpha$ q : guanine nucleotide-binding protein alpha-q             |
| HAIR_553_575_C567S     | 0.2                                 | H: hairless                                                           |
| IKBB_277_299           | 0.3                                 | NFkB: NF-kappa-B inhibitor beta                                       |
| MAPE_249_271           | 0.3                                 | OIP4: OPA-interacting protein 4                                       |
| MAPE_300_322           | 0.4                                 |                                                                       |
| MAPE_454_476_C472S     | 0.2                                 |                                                                       |
| MAPE_91_113            | 0.4                                 |                                                                       |
| MED1_591_614           | 0.5                                 | TRIP-2: thyroid receptor-interacting protein 2                        |
| MED1_632_655           | 0.4                                 |                                                                       |
| MLL2_4175_4197         | 0.4                                 | MLL2/KMT2B: myeloid/lymphoid or mixed-lineage leukemia protein 2      |
| NCOA1_1421_1441        | 0.5                                 | SRC-1/RIP160: nuclear receptor co-activator 1                         |
| NCOA1_620_643          | 0.4                                 |                                                                       |
| NCOA1_677_700          | 0.4                                 |                                                                       |
| NCOA2_628_651          | 0.5                                 | SRC-2/NCoA-2: nuclear receptor co-activator 2                         |
| NCOA2_677_700          | 0.4                                 |                                                                       |
| NCOA3_609_631_C627S    | 0.3                                 | SRC-3/NCoA-3: nuclear receptor co-activator 3                         |
| NCOA3_673_695          | 0.4                                 |                                                                       |
| NCOR1_2039_2061        | 0.3                                 | N-CoR1: nuclear receptor co-repressor 1                               |
| NCOR1_2039_2061_C2056S | 0.4                                 |                                                                       |
| NCOR1_2376_2398        | 0.5                                 |                                                                       |
| NCOR1_662_684_C662S    | 0.4                                 |                                                                       |
| NCOR2_2330_2352        | 0.3                                 | N-CoR2/SMRT: nuclear receptor co-repressor 2                          |
| NCOR2_649_671_C649S    | 0.5                                 |                                                                       |
| NELFB_328_350          | 0.4                                 | NELF-B: negative elongation factor B                                  |
| NELFB_428_450          | 0.4                                 |                                                                       |
| NROB1_1_23             | 0.5                                 | DAX-1: nuclear receptor subfamily member 1                            |
| NROB1_136_159          | 0.5                                 |                                                                       |
| NROB1_68_90_C69S       | 0.4                                 |                                                                       |
| NROB2_106_128          | 0.4                                 | SHP: small heterodimer partner/nuclear receptor subfamily member 2    |
| NROB2_201_223_C207S    | 0.4                                 |                                                                       |
| NROB2_9_31_C9S/C11S    | 0.2                                 |                                                                       |

|                           |     |                                                                |
|---------------------------|-----|----------------------------------------------------------------|
| NRIP1_1055_1077           | 0.5 | RIP140: receptor-interacting protein 1                         |
| NRIP1_120_142             | 0.3 |                                                                |
| NRIP1_121_143_P124R       | 0.4 |                                                                |
| NRIP1_253_275_C263S       | 0.5 |                                                                |
| NRIP1_368_390             | 0.4 |                                                                |
| NRIP1_488_510             | 0.3 |                                                                |
| NRIP1_700_722             | 0.4 |                                                                |
| NRIP1_701_723             | 0.4 |                                                                |
| NRIP1_805_831             | 0.4 |                                                                |
| NRIP1_924_946             | 0.4 |                                                                |
| NRIP1_924_946_C945S       | 0.4 |                                                                |
| NSD1_894_916              | 0.5 | NSDP1: NR-binding SET domain-containing protein                |
| PAK6_248_270              | 0.5 | PAK 6: serine/threonine –protein kinase                        |
| PELP1_168_190             | 0.4 | PELP1: proline-, glutamic acid-, and leucine-rich protein 1    |
| PELP1_258_280             | 0.5 |                                                                |
| PELP1_496_518_C496S       | 0.4 |                                                                |
| PELP1_56_78_C71S          | 0.5 |                                                                |
| PELP1_571_593_C575S/C581S | 0.3 |                                                                |
| PR285_2216_2238_C2219S    | 0.2 | PDIP1: PPAR-gamma DBD-interacting protein 1                    |
| PRGC1_130_155             | 0.5 | PGC1 $\alpha$ : PPAR-g co-activator 1-alpha                    |
| PRGC1_134_154             | 0.5 |                                                                |
| PRGC2_146_166             | 0.4 |                                                                |
| PROX1_57_79               | 0.3 | PROX1: homeobox prospero-like protein                          |
| RAD9A_348_370             | 0.4 | hRAD9: DNA repair exonuclease rad9 homolog A                   |
| TGFI1_325_347_C334S/C346S | 0.5 | TGFI1: transforming growth factor beta-1-induced transcript 1  |
| TGFI1_443_461_C452S/C455S | 0.6 |                                                                |
| TIF1A_373_395_C394S       | 0.2 | TIF1-a: transcription intermediary factor 1-alpha              |
| TIF1A_747_769             | 0.4 |                                                                |
| TIP60_476_498             | 0.6 | Tip60: 60 kDa Tat interactive protein                          |
| TREF1_850_872             | 0.7 | TREF1: transcriptional-regulating factor 1                     |
| TRIP4_149_171_C171S       | 0.4 | ASC-1: activating signal cointegrator 1                        |
| TRRAP_770_792             | 0.6 | STAF40: transformation/transcription domain-associated protein |
| TRRAP_971_993             | 0.5 |                                                                |
| TRXR1_132_154             | 0.2 | TR: thioredoxin reductase TR1                                  |
| ZNH13_89_111              | 0.4 | TRIP-3: thyroid receptor interacting protein 3                 |

<sup>a</sup>Negative interactions defined as: binding value > 50, relative binding < 1, p-value < 0.05

<sup>b</sup>Relative binding value shows each peptide binding relative to the control, 2% DMSO

For complete results, see Excel Table S2

**Table S9. 31 peptides that negatively interact<sup>a</sup> with the BPS/ER $\alpha$  complex derived from 23 coregulators**

| Peptide                   | Relative binding value <sup>b</sup> | Coregulator                                                           |
|---------------------------|-------------------------------------|-----------------------------------------------------------------------|
| BL1S1_1_11                | 0.8                                 | BLOC-1: biogenesis of lysosome-related organelles complex-1 subunit 1 |
| CBP_345_367_C367S         | 0.6                                 | CBP: CREB-binding protein                                             |
| CHD9_1023_1045            | 0.6                                 | CHD9: PPAR-alpha-interacting complex protein 320 kDa                  |
| CNOT1_1626_1648           | 0.4                                 | NOT1H: negative regulator of transcription subunit 1 homolog          |
| CNOT1_1929_1951_C1932S    | 0.3                                 |                                                                       |
| DHX30_49_70               | 0.5                                 | DHX30: DEAH box protein 30                                            |
| GELS_376_398              | 0.5                                 | ADF: actin-depolymerizing factor                                      |
| GNAQ_21_43                | 0.7                                 | G $\alpha$ q : guanine nucleotide-binding protein alpha-q             |
| HAIR_553_575_C567S        | 0.4                                 | H: hairless                                                           |
| MAPE_249_271              | 0.7                                 | OIP4: OPA-interacting protein 4                                       |
| MAPE_300_322              | 0.7                                 |                                                                       |
| MAPE_454_476_C472S        | 0.4                                 |                                                                       |
| MAPE_91_113               | 0.3                                 |                                                                       |
| MGMT_86_108               | 0.7                                 | MGMT: methylated-DNA-protein-cysteine methyltransferase               |
| NCOR1_2039_2061           | 0.6                                 | N-CoR1: nuclear receptor corepressor 1                                |
| NCOR1_2251_2273           | 0.3                                 |                                                                       |
| NCOR1_662_684_C662S       | 0.6                                 |                                                                       |
| NCOR2_2330_2352           | 0.3                                 | N-CoR2/SMRT: nuclear receptor corepressor 2                           |
| NELFB_328_350             | 0.5                                 | NELF-B: negative elongation factor B                                  |
| NRIP1_700_722             | 0.8                                 | RIP140: receptor-interacting protein 1                                |
| PAK6_248_270              | 0.8                                 | PAK 6: serine/threonine –protein kinase PAK 6                         |
| PCAF_178_200              | 0.2                                 | PCAF: P300/CBP-associated factor                                      |
| PELP1_142_164             | 0.4                                 | PELP1: proline-, glutamic acid-, and leucine-rich protein 1           |
| PELP1_258_280             | 0.4                                 |                                                                       |
| PPRC1_1159_1181           | 0.6                                 | PRC: PGC-related coactivator                                          |
| PR285_1062_1084           | 0.4                                 | PDIP1: PPAR-gamma DBD-interacting protein 1                           |
| PRDM2_948_970             | 0.6                                 | PRDP2/MTB-ZF: PR domain-containing protein 2                          |
| RAD9A_348_370             | 0.4                                 | hRAD9: DNA repair exonuclease rad9 homolog A                          |
| TGFI1_325_347_C334S/C346S | 0.7                                 | TGFI1: transforming growth factor beta-1-induced transcript 1         |
| TGFI1_443_461_C452S/C455S | 0.6                                 |                                                                       |
| TIF1A_373_395_C394S       | 0.5                                 | TIF1- $\alpha$ : transcription intermediary factor 1-alpha            |

<sup>a</sup>Negative interactions defined as: binding value>50, relative binding <1, p-value <0.05

<sup>b</sup>Relative binding value shows each peptide binding relative to the control, 2% DMSO

For complete results, see Excel Table S2

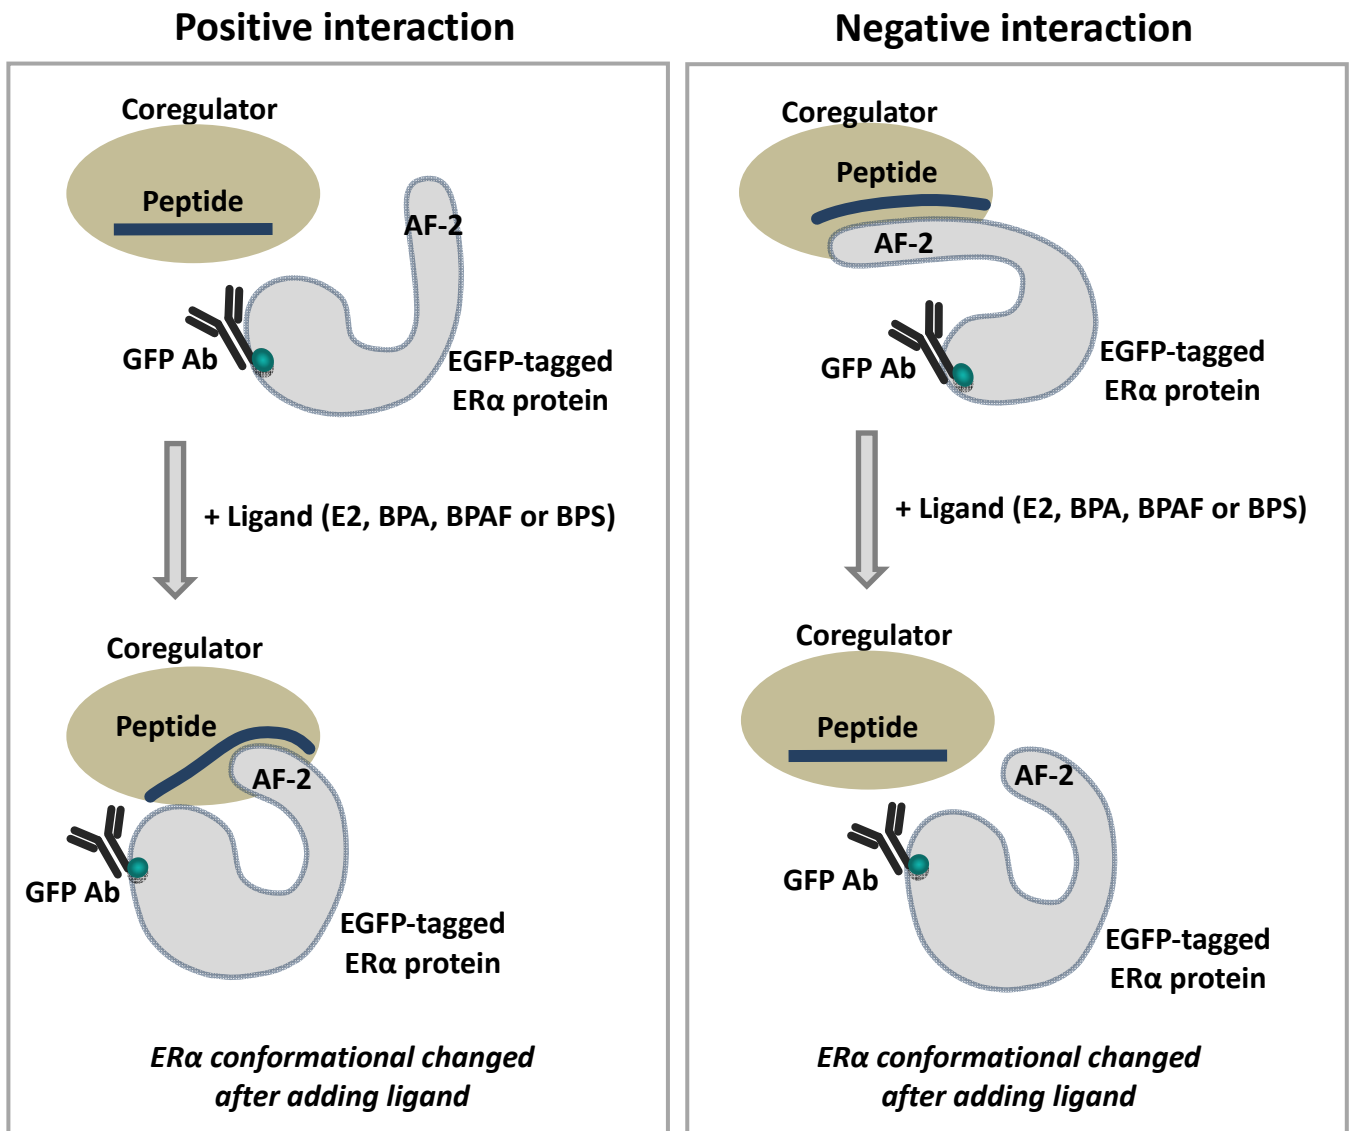

**Supplemental Figure S1. Working model of the MARCoNI assay.** Cell lysates were isolated from the EGFP-tagged full-length human ER $\alpha$ -transfected U2OS cells. For MARCoNI, 25  $\mu$ L assay mixtures that contain cell lysates, 25 nM of Alexa488-conjugated GFP-antibody (Invitrogen), and 0.2 mM ligand (E2, BPA, BPAF or BPS, pre-diluted in DMSO, final concentration 2%) were prepared on ice. The ligand-modulated coregulator interactions with the EGFP-tagged ER $\alpha$  was assessed using a PamChip<sup>®</sup> plate which contained the 154 coregulator-derived binding peptides. The positive interaction means that ligand increases peptide binding and negative interaction means that the ligand decreases peptide binding to ER $\alpha$ .

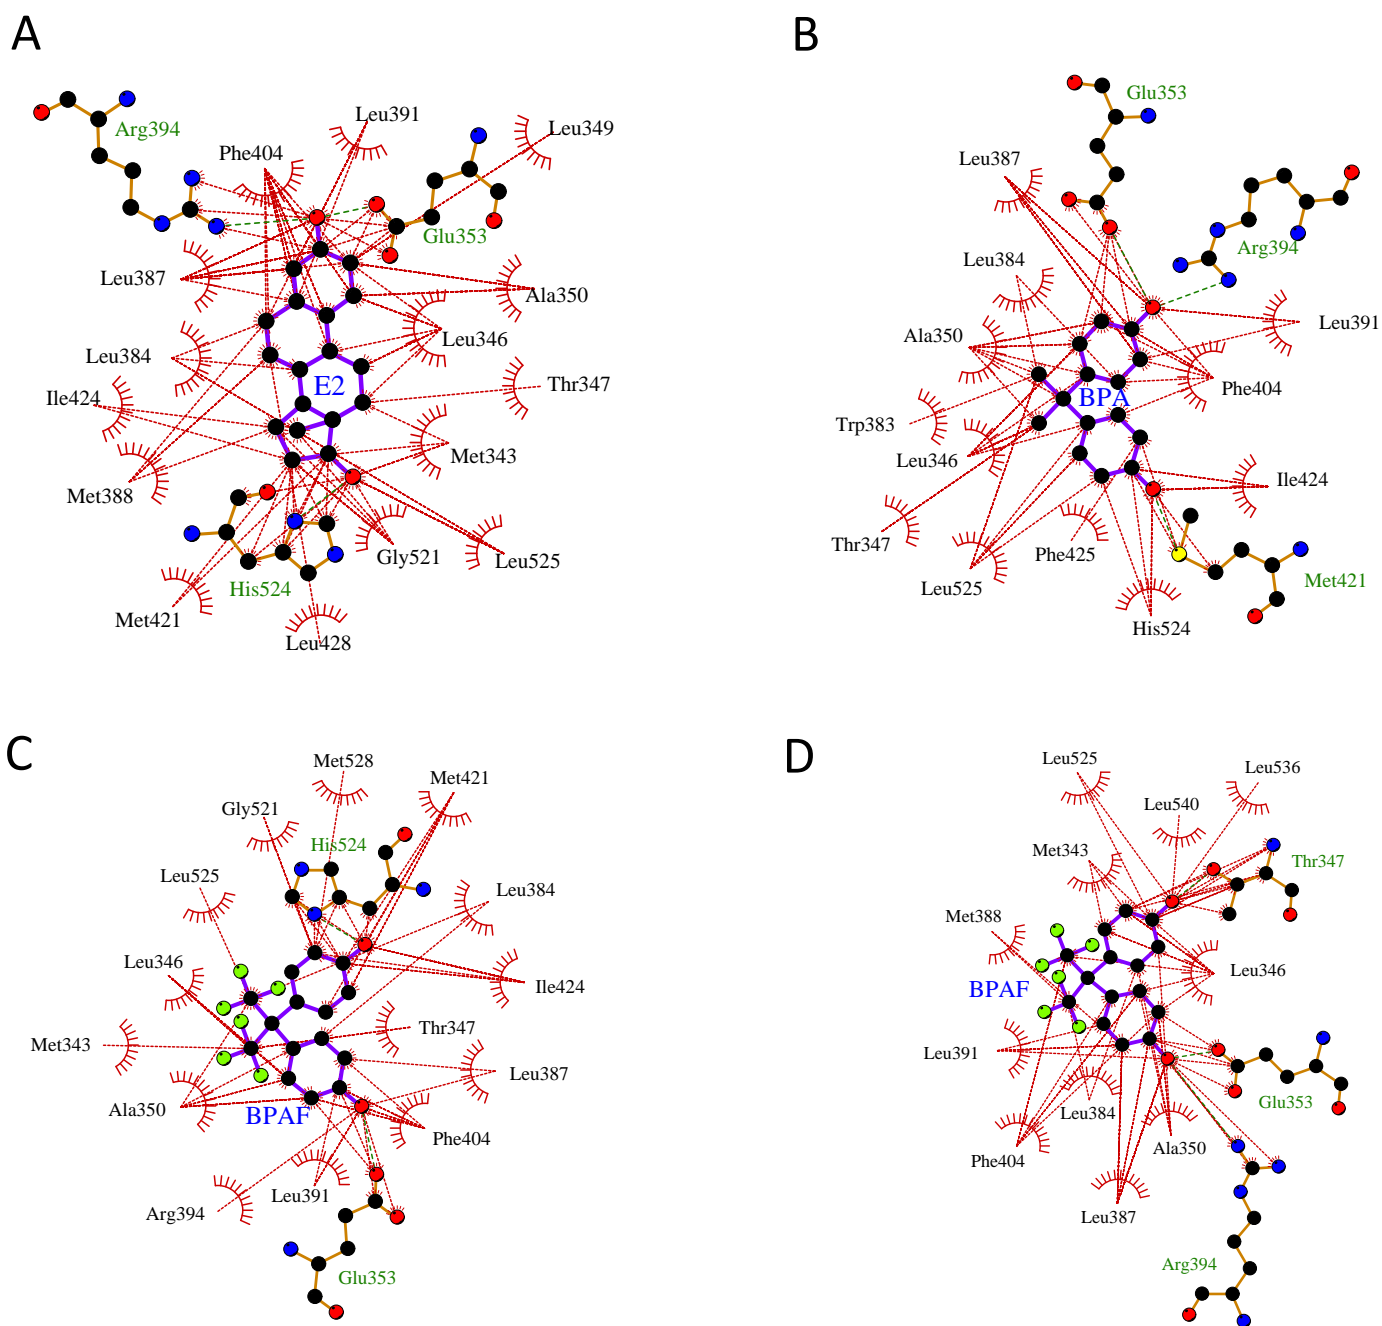

**Supplemental Figure S2. Ligand interactions from the reported X-ray crystal structures.** The ligand interactions with ER that were found in the X-ray crystal structures (A) E2, (B) BPA, and (C and D) BPAF in two conformations.

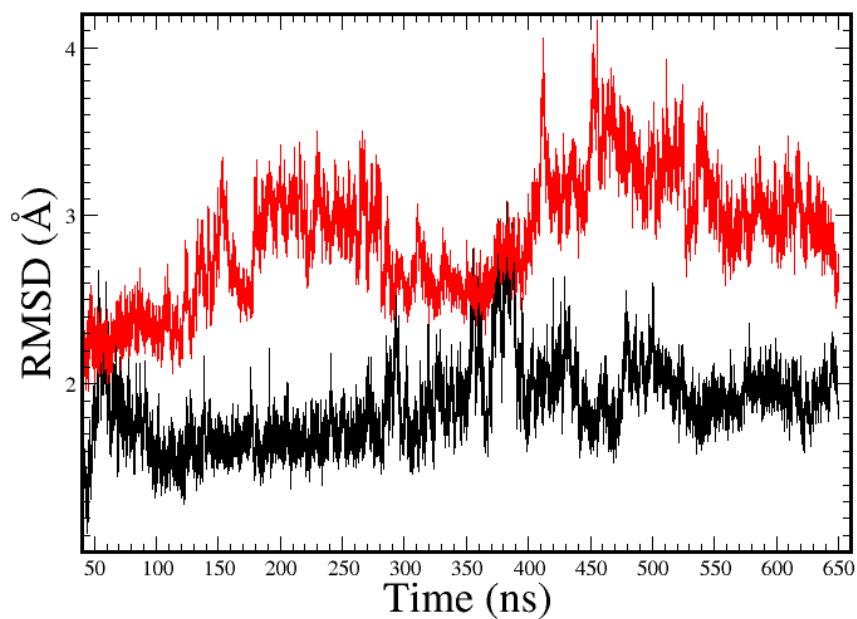

**Supplemental Figure S3. Root mean square deviations (RMSD) of ligand-free ER structures started at agonist (black) and antagonist (red) forms.** The X-ray crystal structures were used as the reference structures for RMSD calculations and all backbone heavy atoms of each residue were used to calculate the average RMSD at each time point.



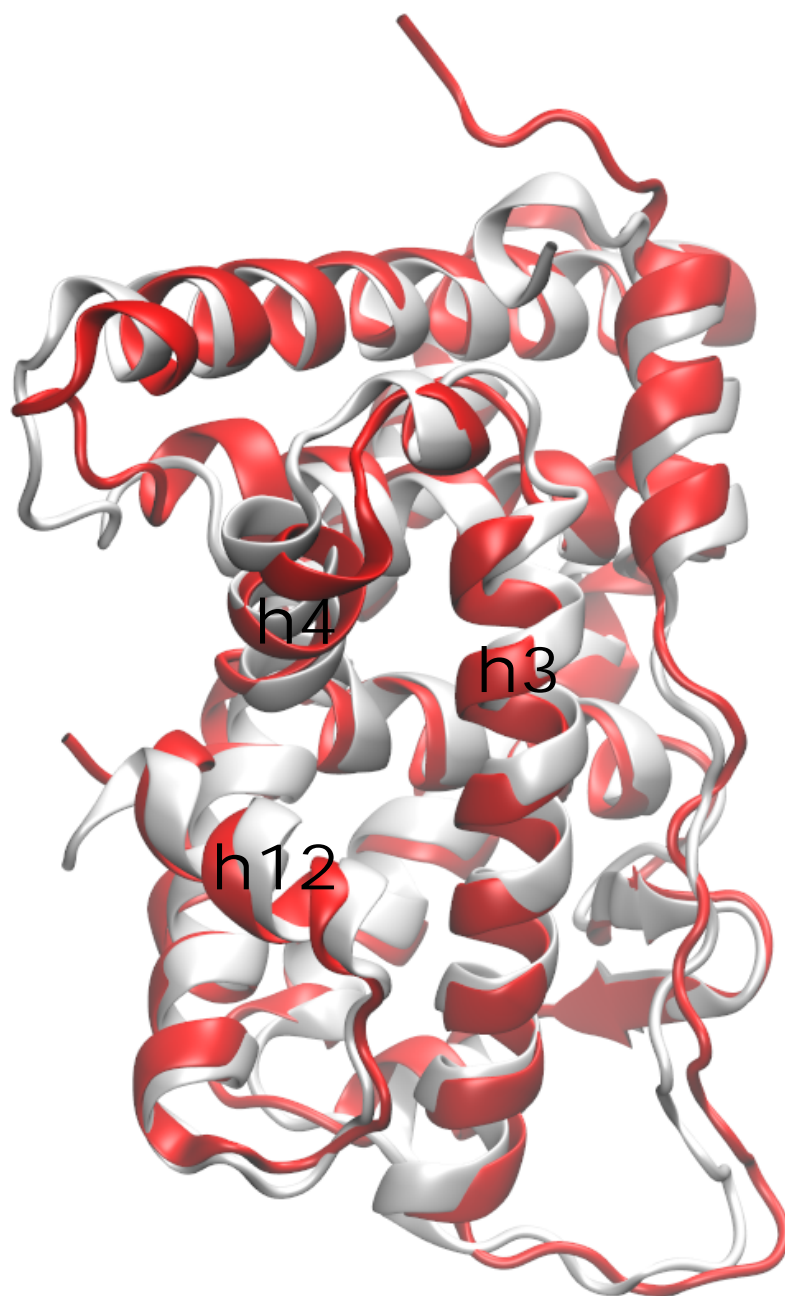

**Supplemental Figure S4. Ligand free conformations of ER $\alpha$  (starting with aqueous agonist form).** Starting conformation is in white and the final conformation is in red. The three helices that are involved in creating the coregulator surface are marked.

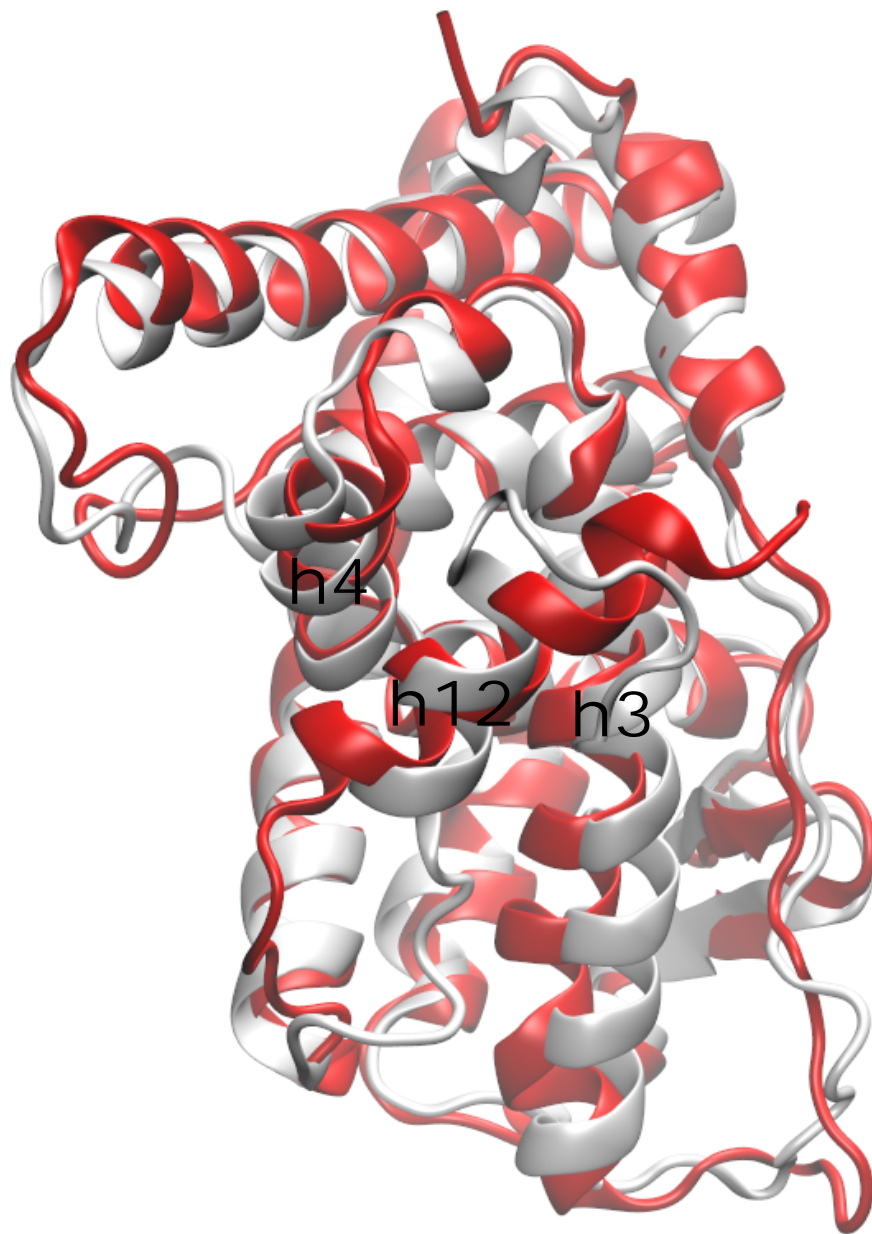

**Supplemental Figure S5. Ligand free conformations of ER $\alpha$  (starting with antagonist form).**

Starting conformation is in white and the final conformation is in red.

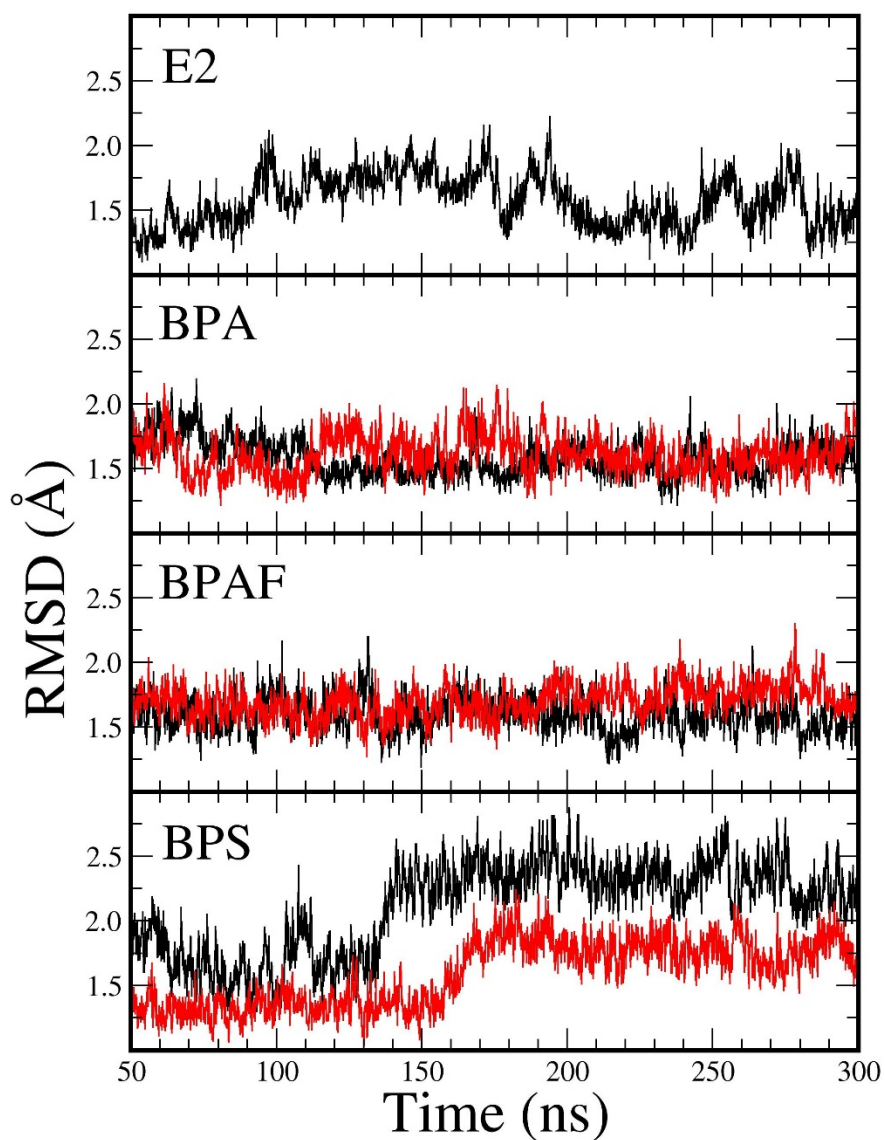

**Supplemental Figure S6. Root mean square deviations (RMSD) of various ligand bound-ER structures.**

The X-ray crystal structures were used as the reference structures for these calculations and all backbone heavy atoms of each residue were used to calculate the average RMSD at each time point. For BPA, BPAF, and BPS, the black curve corresponds to the starting ligand in conformation “1” and the red curve to the ligand in conformation “2”.

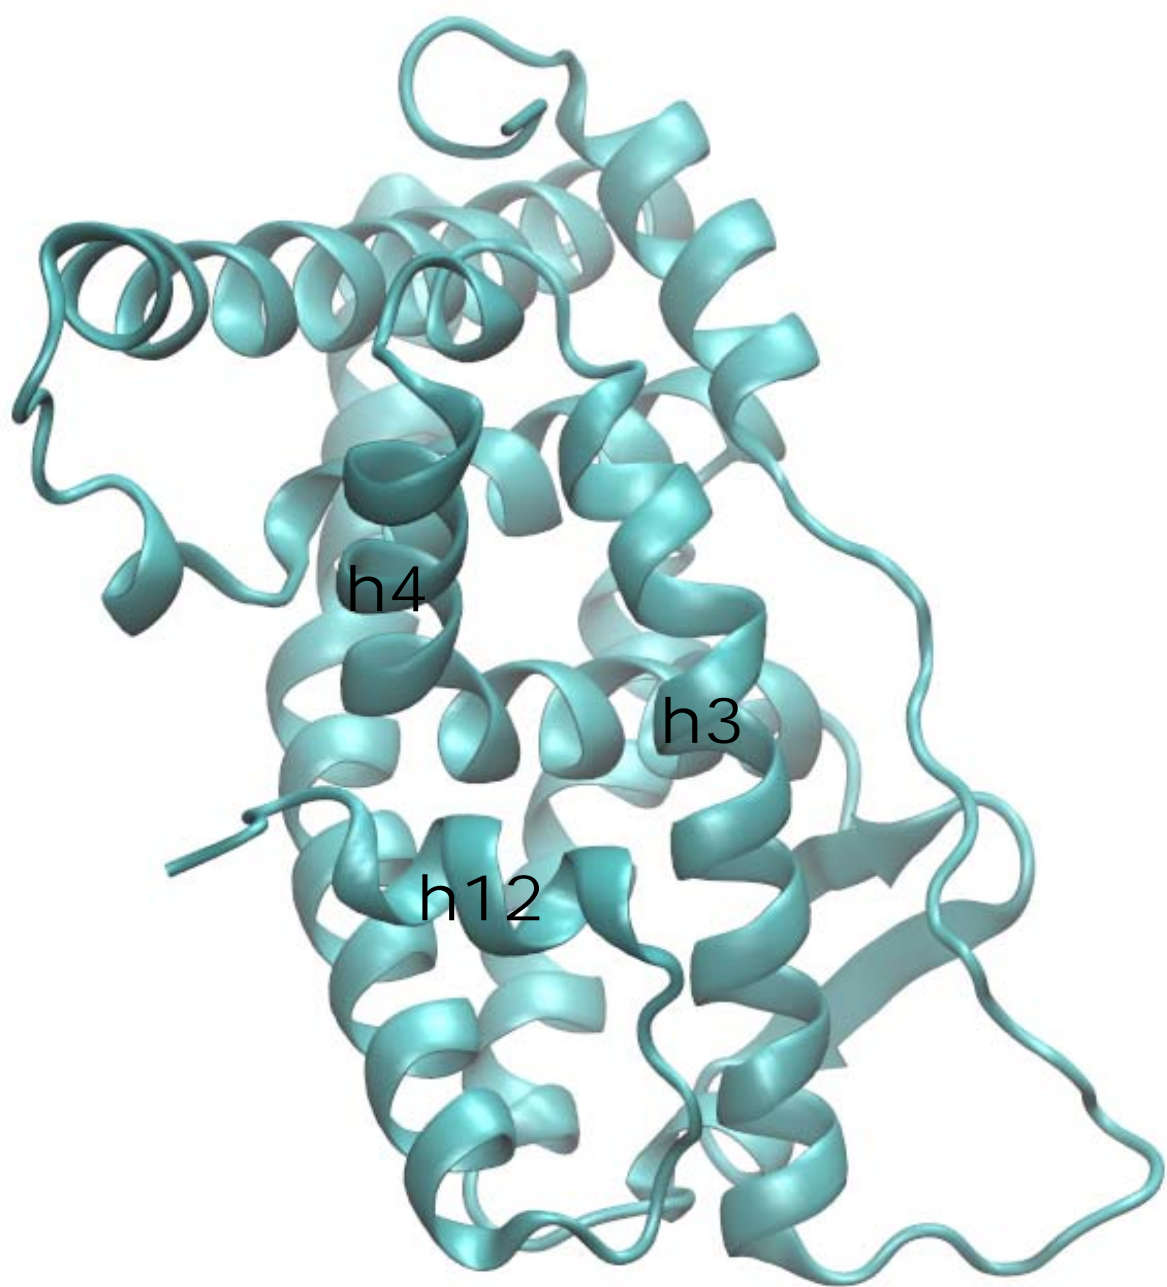

**Supplemental Figure S7. E2-bound conformation of ER $\alpha$  (in which h12 is in agonist conformation).** The final conformation of ER $\alpha$  with E2 from the MD simulation.

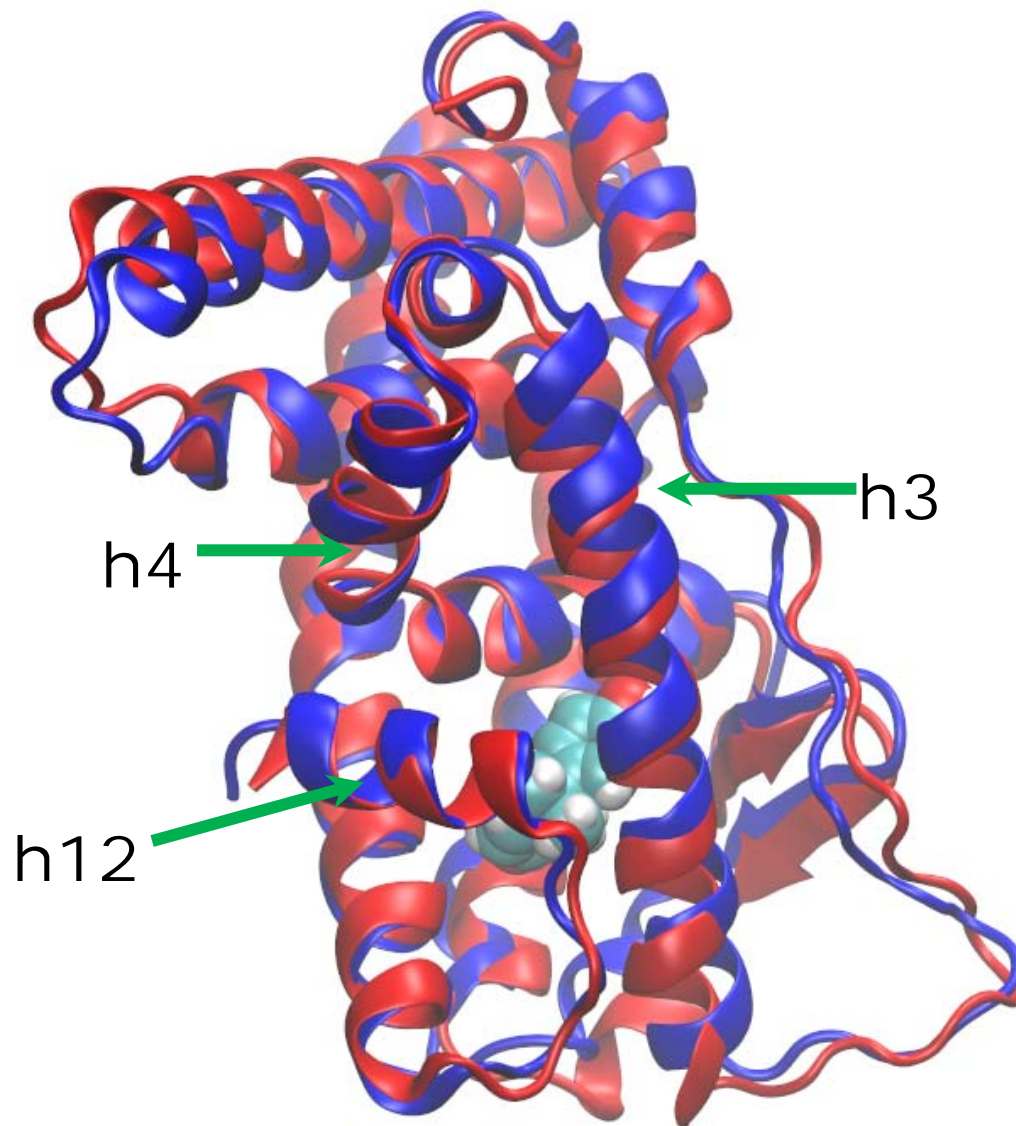

**Supplemental Figure S8. BPA-bound conformations of ER $\alpha$ .** The final conformation of ER $\alpha$  with BPA started in conformation 1 is shown in the blue ribbon; The final conformation of ER $\alpha$  with BPA started in conformation 2 is shown in the red ribbon. BPA is shown in space filling in the ligand binding site of ER $\alpha$ .



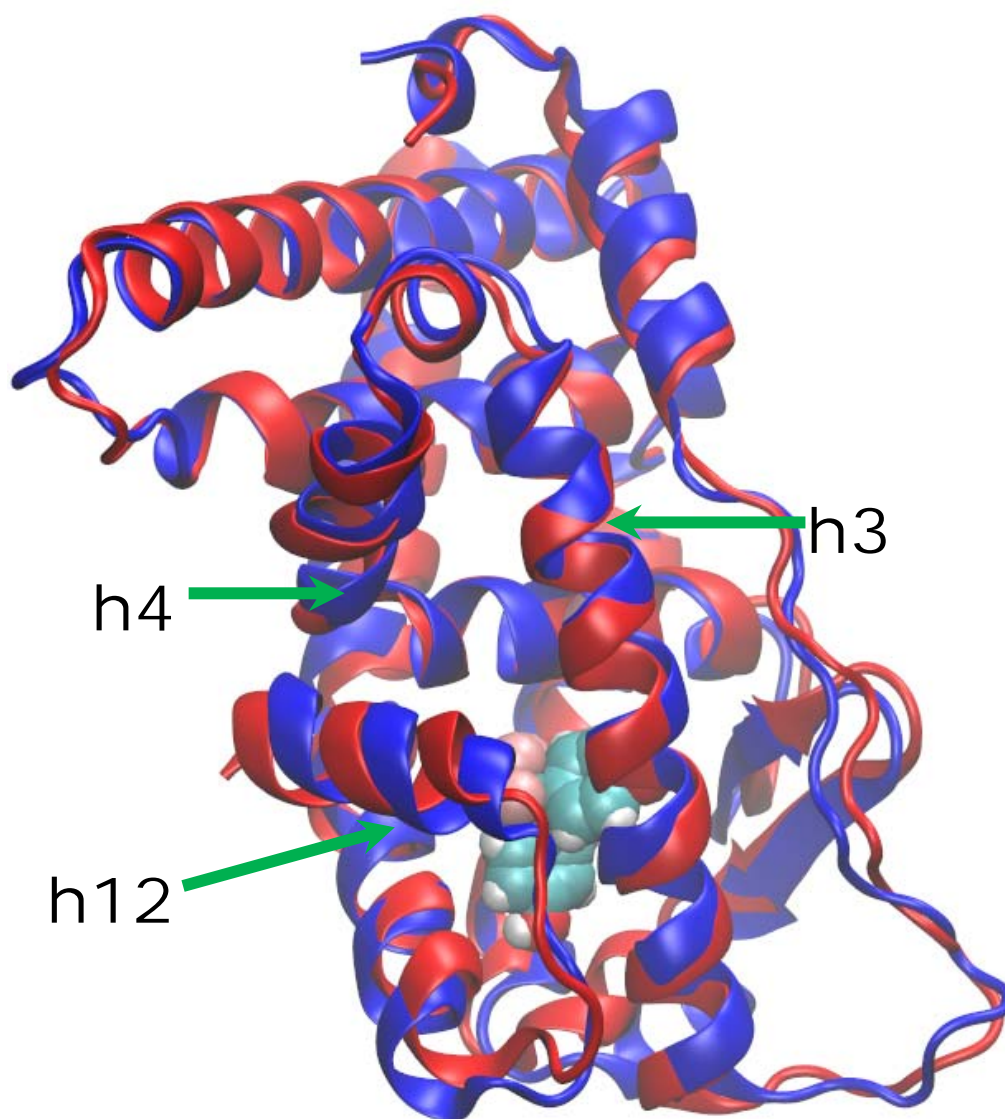

**Supplemental Figure S9. BPAF-bound conformations of ER $\alpha$ .** The final conformation of ER $\alpha$  with BPAF started in conformation 1 is shown in the blue ribbon; The final conformation of ER $\alpha$  with BPAF started in conformation 2 is shown in the red ribbon. BPAF is shown in space filling in the ligand binding site of ER $\alpha$ .

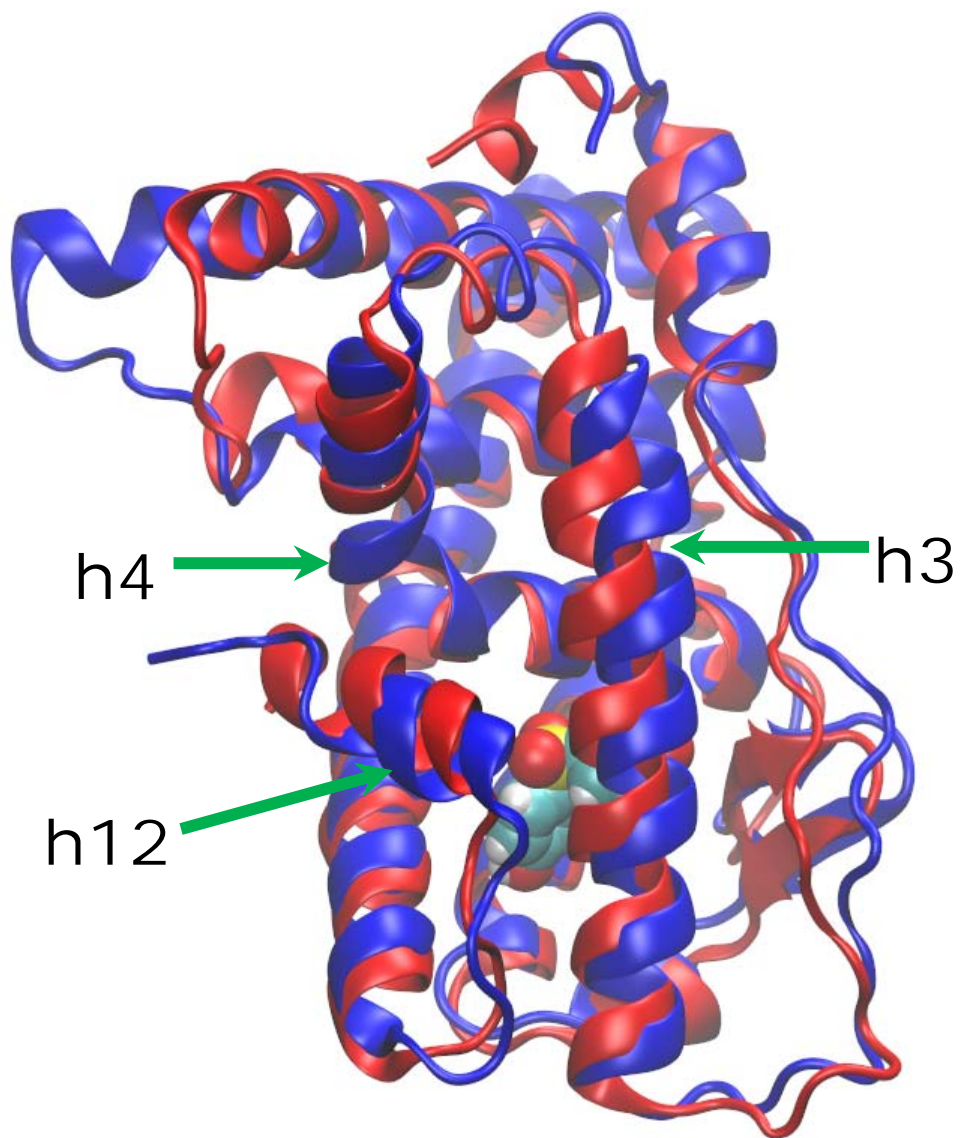

**Supplemental Figure S10. BPS-bound conformations of ER $\alpha$ .** The final conformation of ER $\alpha$  with BPS started in conformation 1 is shown in the blue ribbon; The final conformation of ER $\alpha$  with BPS started in conformation 2 is shown in the red ribbon. BPS is shown in space filling in the ligand binding site of ER $\alpha$ .

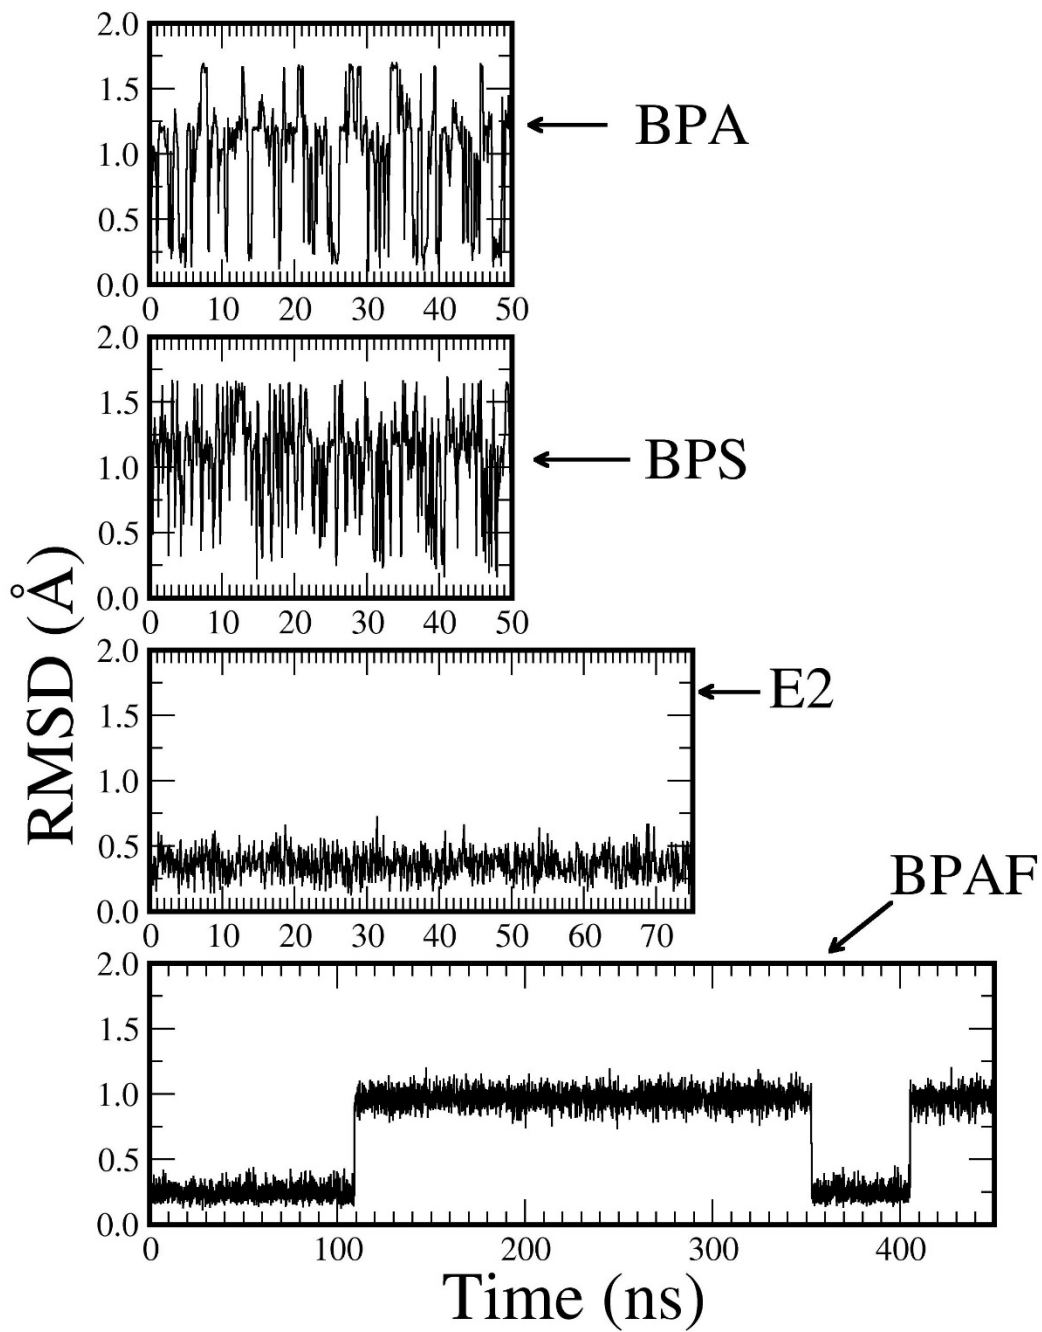

**Supplemental Figure S11. Root mean square deviations (RMSD) of the ligands in their aqueous environments.** Starting structures were used as the reference structures for these calculations and all heavy atoms of the ligand were used to calculate the average RMSD at each time point.
